# Supplementary material for: A concise protecting-group-free synthesis of cephalosporolides E and F
Source: Royal Society of Chemistry journal article supplement (doi:10.1039/c5ra06991b), 2015-01-01

## Supporting Information

### **A Concise Protecting-Group-Free Synthesis of Cephalosporolides E and F**

Dipaali Chaudari, Pullaiah Kattanguru and Rodney A. Fernandes\*

*Department of Chemistry, Indian Institute of Technology Bombay, Powai,  
Mumbai 400 076 Maharashtra, India. E-mail: [rfernand@chem.iitb.ac.in](mailto:rfernand@chem.iitb.ac.in)*

Copies of  $^1\text{H}$  and  $^{13}\text{C}$  NMR spectra for all the compounds ..... S2–S5

<sup>1</sup>H NMR (400 MHz, CDCl<sub>3</sub>/TMS) and <sup>13</sup>C NMR (100 MHz, CDCl<sub>3</sub>) of Compound 7

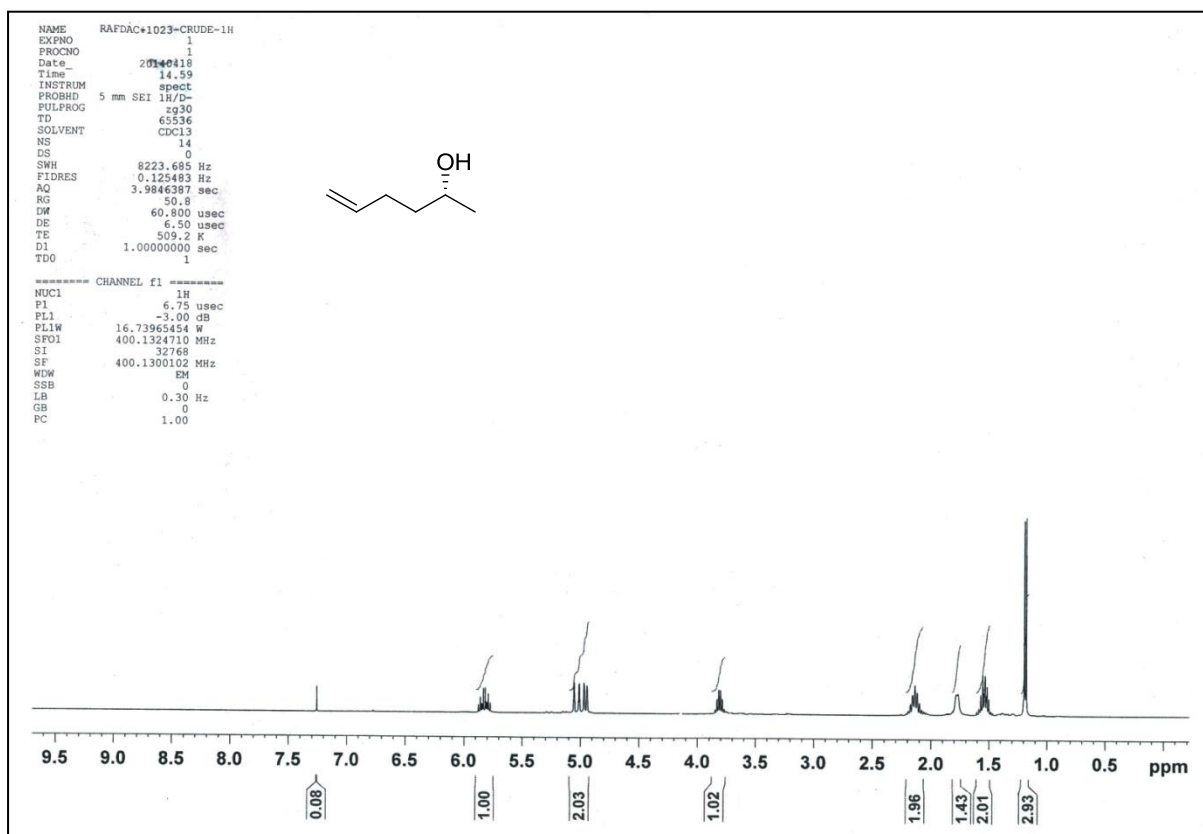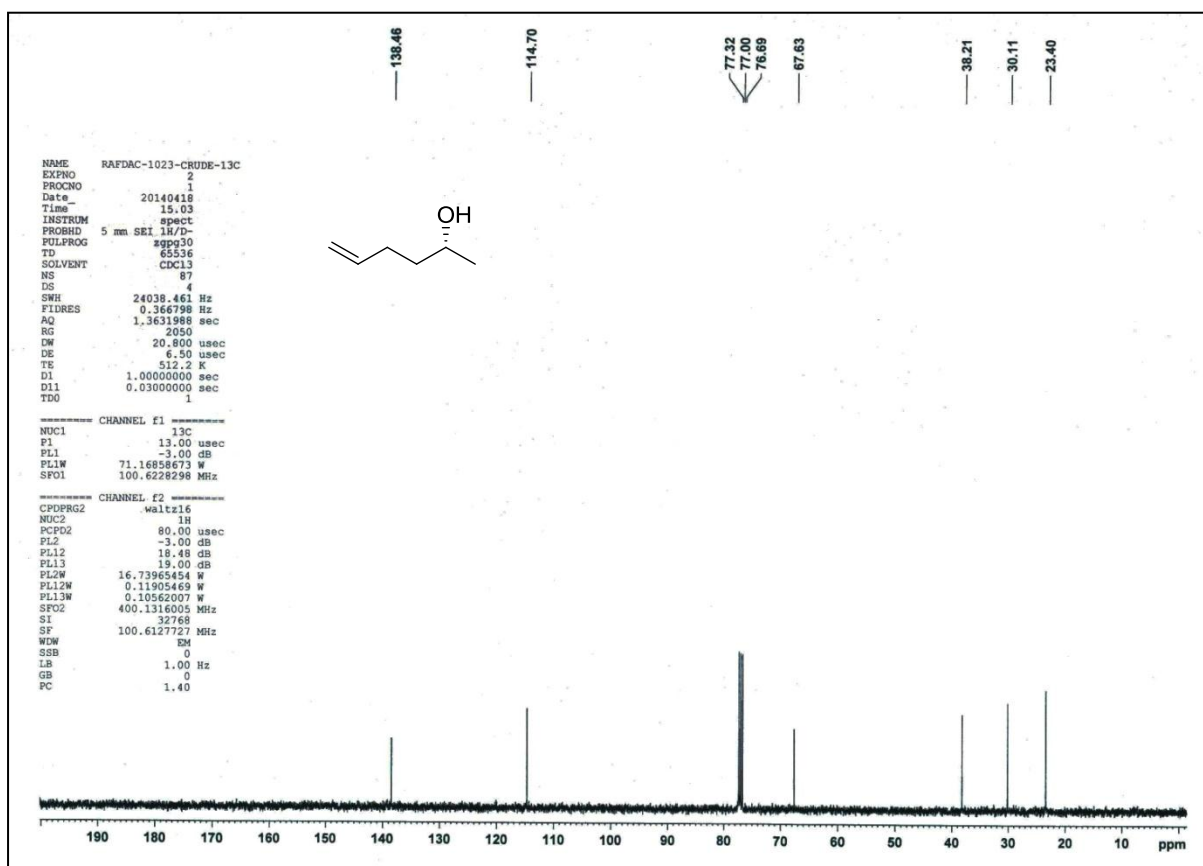

$^1\text{H}$  NMR (400 MHz,  $\text{CDCl}_3/\text{TMS}$ ) and  $^{13}\text{C}$  NMR (100 MHz,  $\text{CDCl}_3$ ) of Compound 6

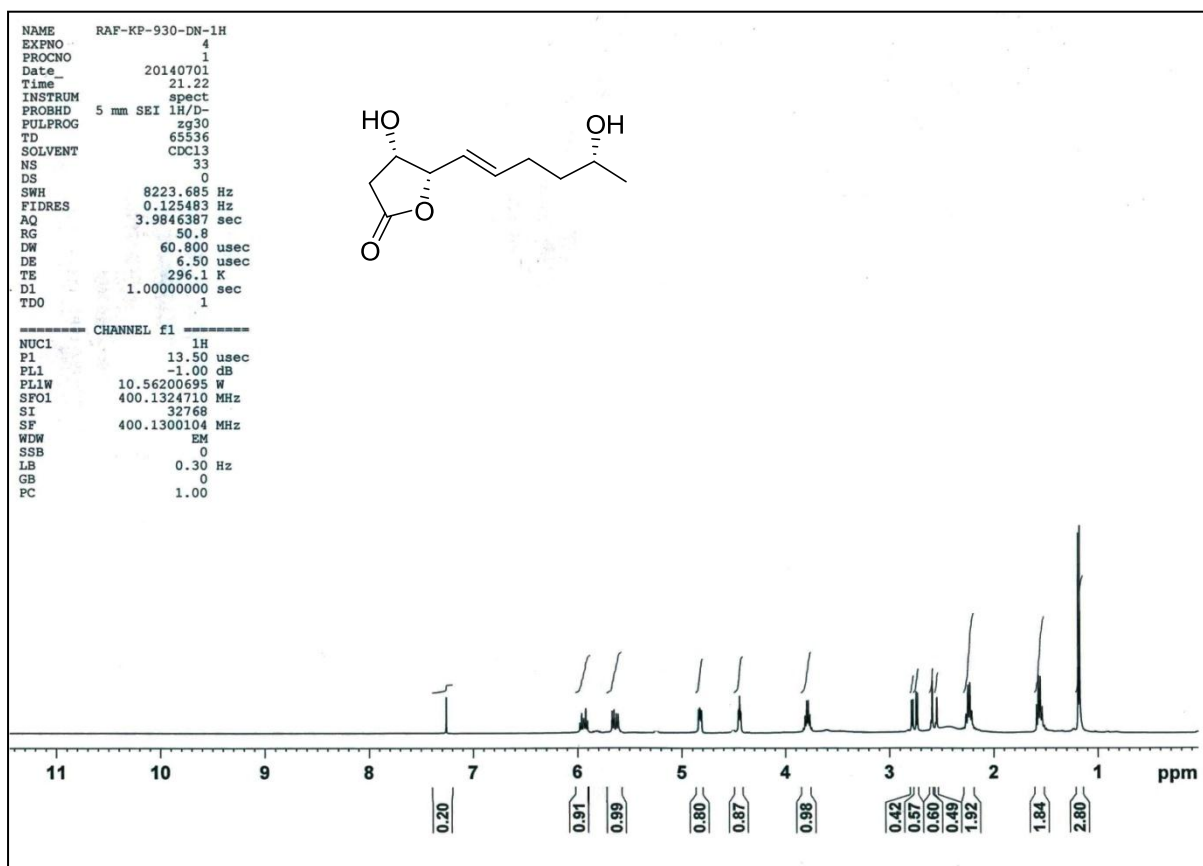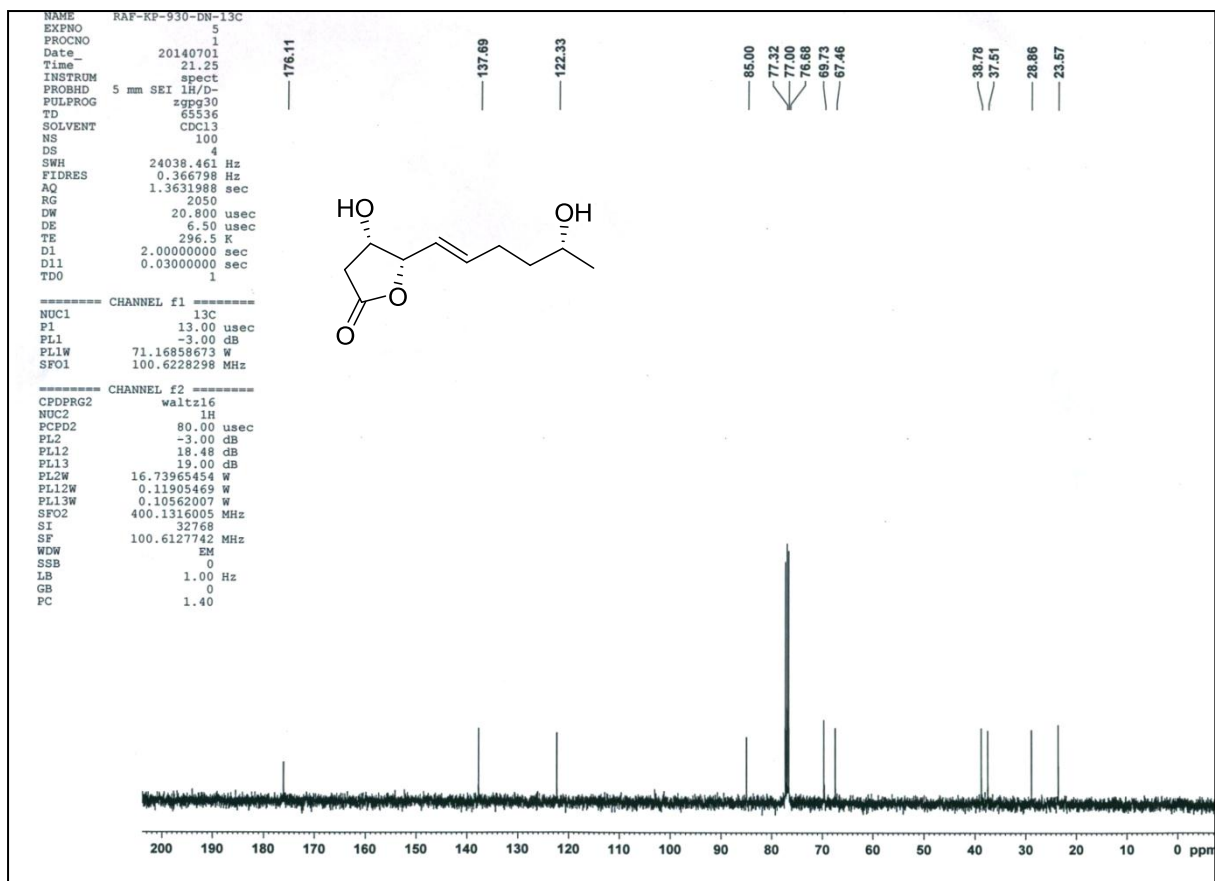

<sup>1</sup>H NMR (500 MHz, CDCl<sub>3</sub>/TMS) and <sup>13</sup>C NMR (100 MHz, CDCl<sub>3</sub>) of Compound 1

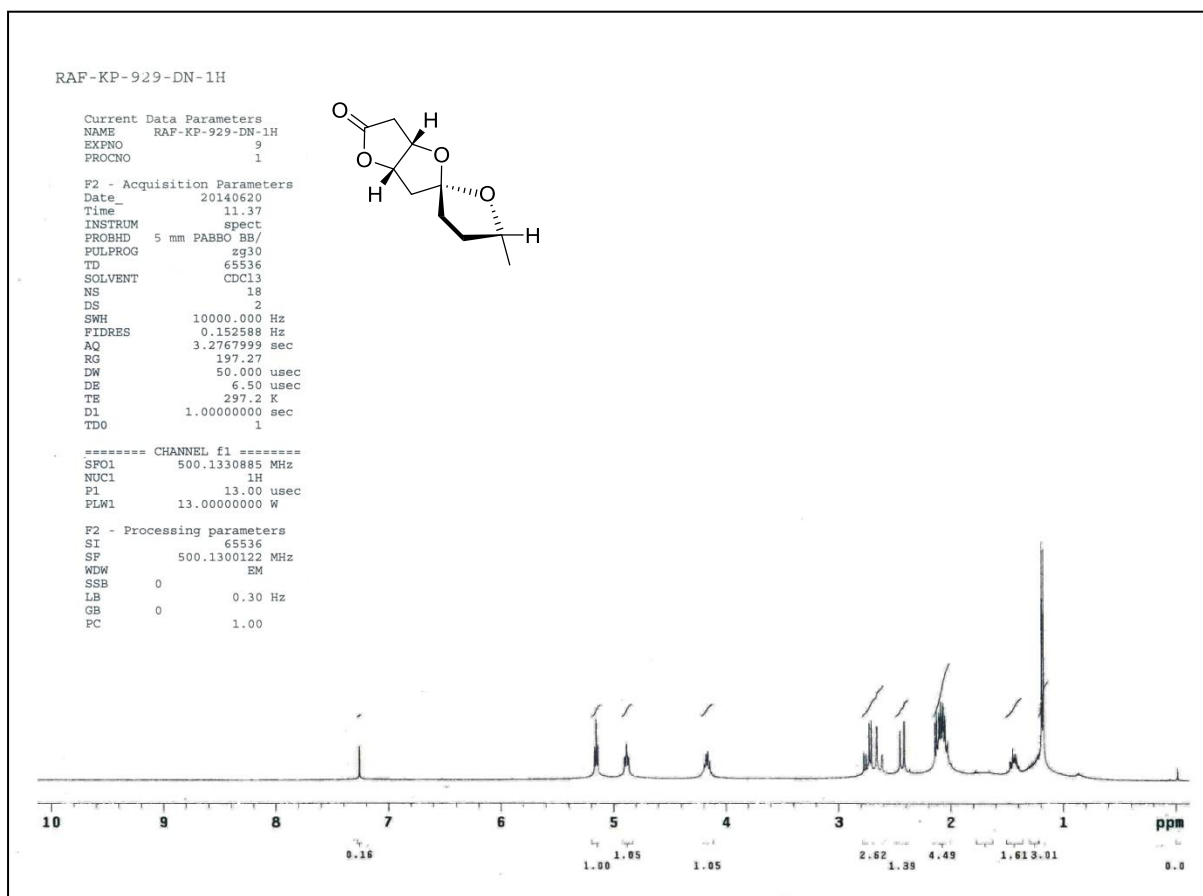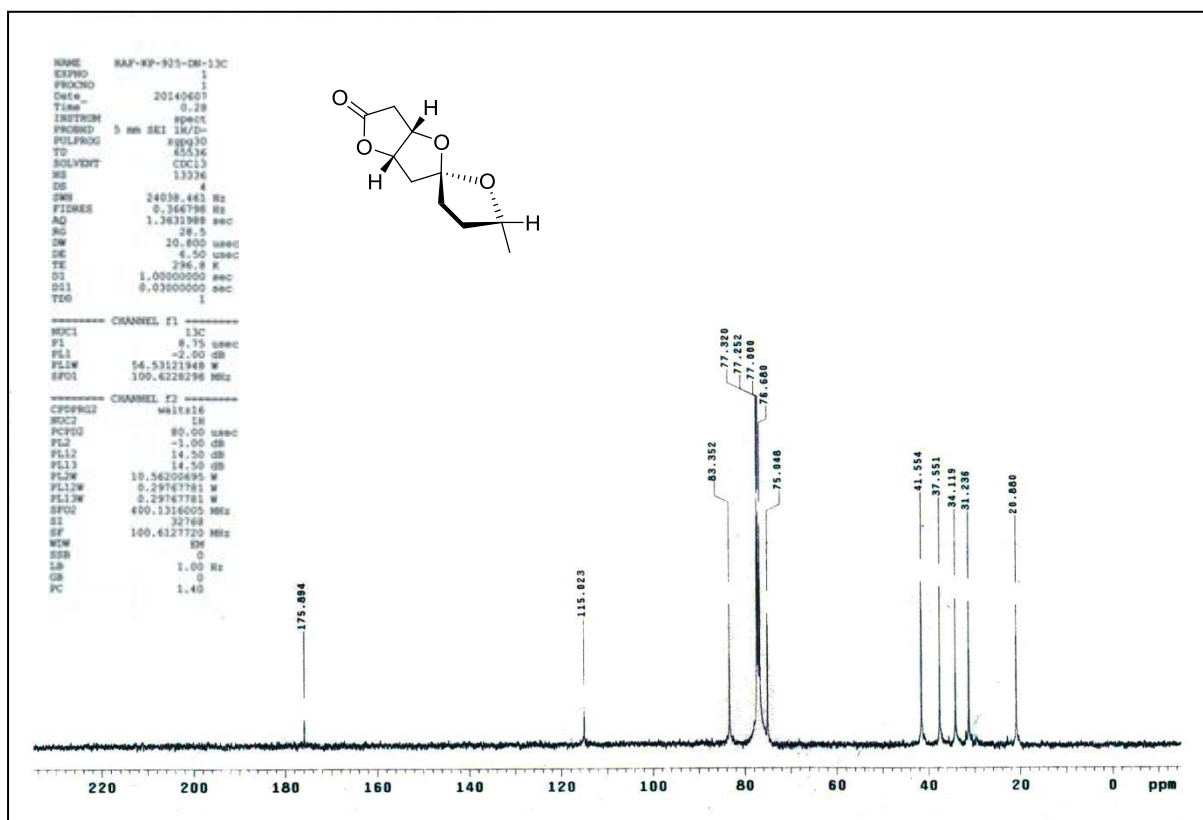

$^1\text{H}$  NMR (500 MHz,  $\text{CDCl}_3/\text{TMS}$ ) and  $^{13}\text{C}$  NMR (100 MHz,  $\text{CDCl}_3$ ) of Compound 2

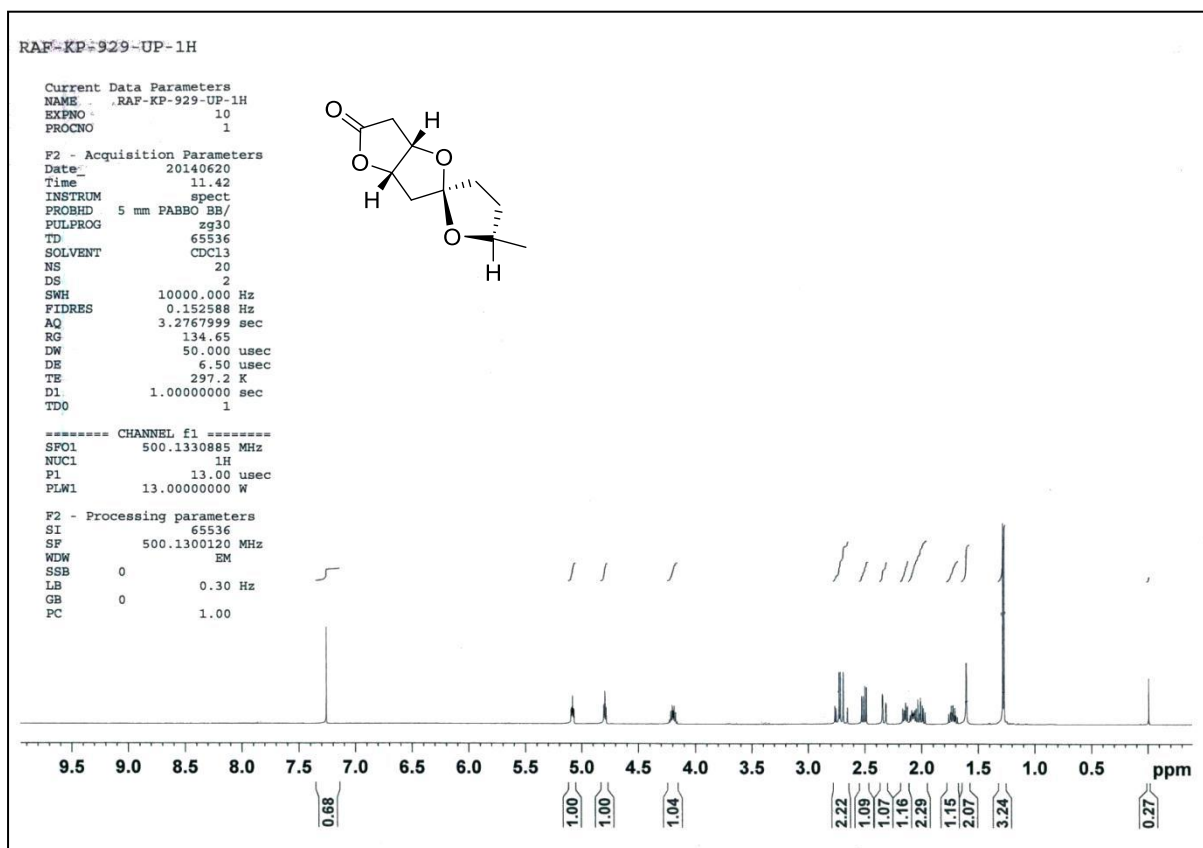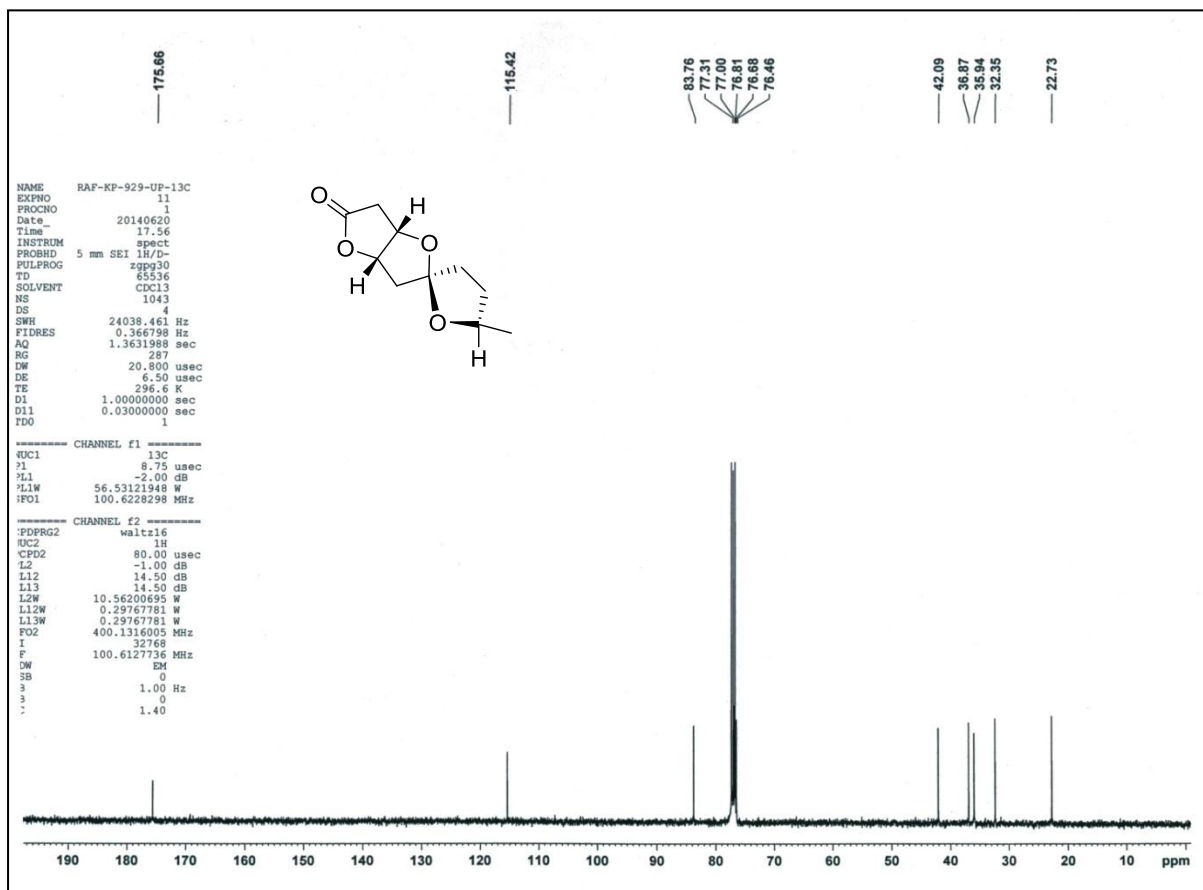

Supplement: c5ra06991b1.pdf [file c5ra06991b1.pdf]
